# Supplementary material for: Associations Between Sarcopenia and Hearing Loss Considering Muscle Mass, Strength, and Activity
Source: Research Square preprint supplement (doi:10.21203/rs.3.rs-7088582/v1), 2025-08-22
Supplement: Supplementary file 1 [file bb6b16720f3a9cd774cd132e.docx]

# Kyotango Longevity Health Checkup – Health Questionnaire

This questionnaire is designed to investigate the relationship between lifestyle habits and health, and to support your personal health management.

Please read each question carefully and answer accordingly.

※ If any questions are unclear or difficult to answer, you may leave them blank and bring the form with you on the day of your checkup. The staff will assist you through an interview.

## 1. Name

## 2. Sex

☐ Male　　☐ Female

## 3. Date of Birth

Era: Taisho / Showa / Heisei ( ) year ( ) month ( ) day

## 4. Address

Postal Code: (〒 )

Kyoto Prefecture

# Section 2 — Medical History

Q1. Are you currently being treated for any illnesses or have you ever been diagnosed by a doctor with any of the following conditions?

☐ Yes ⇒ If yes, please proceed to Q2.

☐ No ⇒ If no, please skip to Q3.

Q2. For those currently undergoing treatment, please check the box under “Under Treatment”. For those who were diagnosed in the past, please check the box under “Past Diagnosis”.

| Disease | Under Treatment | Past Diagnosis |
| --- | --- | --- |
| Brain disease (e.g., stroke) | ☐ | ☐ |
| Heart disease | ☐ | ☐ |
| Stomach or intestinal disease | ☐ | ☐ |
| Liver disease | ☐ | ☐ |
| Kidney disease | ☐ | ☐ |
| Bone/joint disease | ☐ | ☐ |
| Osteoporosis | ☐ | ☐ |
| Fracture (If yes, specify site and age: e.g., right wrist at age 10) | ☐ | ☐ |
| Ear disease | ☐ | ☐ |
| Nasal disease (e.g., chronic sinusitis, allergic rhinitis, dust allergy) | ☐ | ☐ |
| Bronchial asthma | ☐ | ☐ |
| Diabetes | ☐ | ☐ |
| Hypertension | ☐ | ☐ |
| Dyslipidemia (cholesterol or triglycerides) | ☐ | ☐ |
| Urinary stones (kidney or ureteral) | ☐ | ☐ |
| Dementia | ☐ | ☐ |
| Rheumatoid arthritis | ☐ | ☐ |
| Other (specify) | ☐ | ☐ |

Staff Use Only: Confirm diagnosis and history

## Section 2 — Hospitalization, Surgery, and Medication Use

Q3. Have you ever been hospitalized?

☐ Yes ⇒ If yes, please write the disease name.

☐ No

Q4. Have you ever had surgery?

☐ Yes ⇒ If yes, please write the disease name.

☐ No

Q5. Are you currently taking any over-the-counter medications regularly?

(*Medications prescribed by a physician are not included*)

☐ Yes　　☐ No

Q6. Are you currently taking any over-the-counter supplements regularly?

☐ Yes　　☐ No

Q7. Are you currently taking any medications prescribed by a physician?

(*This does not include over-the-counter drugs or supplements*)

☐ Yes ⇒ If yes, please check all applicable medications below.

☐ No

Please check the medications you are currently taking:

☐ Medication for hypertension

☐ Medication for hyperlipidemia (cholesterol or triglycerides)

☐ Medication for diabetes

☐ Sleeping pills

☐ Pain relievers / antipyretics

☐ Laxatives (for constipation)

☐ Medication for osteoporosis

☐ Medication for rheumatoid arthritis

☐ Corticosteroids

☐ Antibiotics

☐ Cold medicine (name: )

☐ Kampo medicine (Japanese herbal medicine) (name: )

☐ Others (name: )

☐ Medications for dementia

☐ Cognitive enhancers

## Section 3 — Diet, Smoking, Alcohol, and Physical Activity

Q1. How many meals do you eat per day?

☐ Four or more times per day, including snacks between meals

☐ Two meals per day (please indicate which: ☐ Breakfast ☐ Lunch ☐ Dinner)

☐ Three meals per day (breakfast, lunch, and dinner)

☐ No fixed pattern

☐ Other: (　　　　　　　)

Q2. How often do you eat snacks between meals?

☐ Never

☐ Less than once a week

☐ 1–2 times per week

☐ 3 or more times per week

## Section 4 — Smoking and Passive Smoking

Q1. What is your current smoking status?

☐ I do not smoke

☐ I currently smoke

☐ I used to smoke

If you selected “I do not smoke”, please proceed to the next question.

Age when you started smoking: around (　　) years old

Number of cigarettes per day: about (　　) per day

If you used to smoke:

Started smoking at around (　　) years old and quit at around (　　) years old

Number of cigarettes smoked per day: about (　　)

Q2. Do you live or work in a place where others smoke in the same room?

☐ Yes

☐ No

## Section 5 — Alcohol Consumption

Q1. Did you drink alcohol over the past year?

☐ No (including only a few times per month) ⇒ proceed to next section

☐ Yes, I currently drink

☐ I used to drink but have quit ⇒ proceed to Q4

Q4. If you selected “used to drink”, what type and amount did you drink on average per day?

Please check all that apply and indicate the approximate quantity:

Beer: ☐ Did not drink ☐ Drank → Large bottle (　　), 350ml can (　　), 500ml can (　　)

Sake (Japanese rice wine): ☐ Did not drink ☐ Drank → (　　) go (180ml units)

Shochu (distilled liquor): ☐ Did not drink ☐ Drank → Neat (　　) cups or mixed (　　) cups

Whisky: ☐ Did not drink ☐ Drank → (　　) glasses (with water)

Wine: ☐ Did not drink ☐ Drank → (　　) glasses

## Section 6 — Physical Activity and Exercise

Q1. Do you engage in regular exercise or sports (excluding winter)?

☐ Yes

☐ No

If yes, please list the types of activities and frequency:

Type 1: (　　　　　), Frequency: (　　) days/week, Duration: (　　) hours (　　) minutes

Type 2: (　　　　　), Frequency: (　　) days/week, Duration: (　　) hours (　　) minutes

Type 3: (　　　　　), Frequency: (　　) days/week, Duration: (　　) hours (　　) minutes

Q2. Do you engage in regular exercise or sports during winter?

☐ Yes

☐ No

If yes, please fill in the same information as above.

## Section 7 — Self-Efficacy and Health Management

Please indicate the degree to which you agree with the following statements:

| Statement | Strongly Agree | Agree | Neutral | Disagree | Strongly Disagree |
| --- | --- | --- | --- | --- | --- |
| ① I am good at managing my health. | ☐ | ☐ | ☐ | ☐ | ☐ |
| ② No matter how hard I try, I cannot seem to achieve good health. | ☐ | ☐ | ☐ | ☐ | ☐ |
| ③ It is difficult to find effective solutions when facing health problems. | ☐ | ☐ | ☐ | ☐ | ☐ |
| ④ I can carry out concrete plans to improve my health. | ☐ | ☐ | ☐ | ☐ | ☐ |
| ⑤ I can usually achieve my health goals. | ☐ | ☐ | ☐ | ☐ | ☐ |
| ⑥ Even if I try to change bad health habits, I do not succeed. | ☐ | ☐ | ☐ | ☐ | ☐ |
| ⑦ I often fail to follow through with plans for improving my health. | ☐ | ☐ | ☐ | ☐ | ☐ |
| ⑧ I can engage in health-promoting behaviors just like anyone else. | ☐ | ☐ | ☐ | ☐ | ☐ |

## Section 8 — Sleep Habits (During the Past Month)

Q1. What time did you usually go to bed?

Time: (　　) hour (　　) minute (AM / PM)

Q2. How long did it usually take for you to fall asleep after going to bed?

About (　　) minutes

Q3. What time did you usually wake up?

Time: (　　) hour (　　) minute (AM / PM)

Q4. How many hours of sleep did you usually get per night, including naps?

About (　　) hours (　　) minutes

Q5. Did you take naps during the day?

☐ Yes　☐ No

If yes, about (　　) hours (　　) minutes per day

Q6. Over the past month, how often did the following occur due to sleep problems?

(Choose one: ☐ Never ☐ Less than once a week ☐ 1–2 times/week ☐ 3 or more times/week)

- Could not fall asleep within 30 minutes

- Woke up in the middle of the night or early morning

- Woke up to use the bathroom

- Felt short of breath

- Coughed or snored loudly

- Felt very cold

- Felt very hot

- Had bad dreams

- Felt pain

- Other: (Specify reason: _________)

Q7. Overall, how would you rate the quality of your sleep over the past month?

☐ Very good　☐ Fairly good　☐ Fairly bad　☐ Very bad

Q8. How often did you take sleep medication over the past month?

☐ Never　☐ Less than once a week　☐ 1–2 times/week　☐ 3 or more times/week

Q9. How often did you feel drowsy when you should stay awake (e.g., at work)?

☐ Never　☐ Less than once a week　☐ 1–2 times/week　☐ 3 or more times/week

Q10. How much trouble did you have staying motivated to complete tasks during the past month?

☐ None at all　☐ A little　☐ Some　☐ Very much

## Section 9 — Physical Function, Pain, and Mental Health

Q1. How would you describe your current health status?

☐ Excellent　☐ Very good　☐ Good　☐ Fair　☐ Poor

Q2. Compared to one year ago, how is your current health?

☐ Much better than a year ago

☐ Somewhat better than a year ago

☐ About the same as a year ago

☐ Worse than a year ago

☐ Much worse than a year ago

Q3. Do you experience difficulty with the following activities?

| Activity | Very difficult | A little difficult | Not difficult |
| --- | --- | --- | --- |
| Running or lifting heavy objects | ☐ | ☐ | ☐ |
| Cleaning the house or walking for 1–2 hours | ☐ | ☐ | ☐ |
| Carrying moderately heavy objects | ☐ | ☐ | ☐ |
| Climbing several flights of stairs | ☐ | ☐ | ☐ |
| Climbing one flight of stairs | ☐ | ☐ | ☐ |
| Bending forward, kneeling, or squatting | ☐ | ☐ | ☐ |
| Walking over 1 kilometer | ☐ | ☐ | ☐ |
| Walking several hundred meters | ☐ | ☐ | ☐ |
| Walking about 100 meters | ☐ | ☐ | ☐ |
| Bathing or dressing independently | ☐ | ☐ | ☐ |

Q4. In the past month, did you experience physical limitations in work or daily activities?

| Item | Always | Often | Sometimes | Rarely | Never |
| --- | --- | --- | --- | --- | --- |
| Reduced the amount of work/daily activity | ☐ | ☐ | ☐ | ☐ | ☐ |
| Could not perform as well as desired | ☐ | ☐ | ☐ | ☐ | ☐ |
| Could not perform certain tasks due to physical conditions | ☐ | ☐ | ☐ | ☐ | ☐ |
| Needed more effort than usual to complete tasks | ☐ | ☐ | ☐ | ☐ | ☐ |

Q5. In the past month, did you experience limitations due to emotional problems?

| Item | Always | Often | Sometimes | Rarely | Never |
| --- | --- | --- | --- | --- | --- |
| Reduced the amount of work/daily activity | ☐ | ☐ | ☐ | ☐ | ☐ |
| Could not perform as well as desired | ☐ | ☐ | ☐ | ☐ | ☐ |
| Had difficulty concentrating on tasks | ☐ | ☐ | ☐ | ☐ | ☐ |

Q6. In the past month, how much was your social life affected by physical or psychological problems?

☐ Not at all　☐ Slightly　☐ Moderately　☐ Considerably　☐ Extremely

Q7. In the past month, how much bodily pain did you experience?

☐ None　☐ Very mild　☐ Mild　☐ Moderate　☐ Severe　☐ Very severe

Q8. In the past month, to what extent did pain interfere with your normal work (including housework)?

☐ Not at all　☐ Slightly　☐ Moderately　☐ Considerably　☐ Extremely

Q9. In the past month, how often did you feel the following?

| Item | Always | Almost always | Sometimes | Rarely | Never |
| --- | --- | --- | --- | --- | --- |
| Felt full of energy | ☐ | ☐ | ☐ | ☐ | ☐ |
| Felt nervous | ☐ | ☐ | ☐ | ☐ | ☐ |
| Felt down so much that nothing could cheer you up | ☐ | ☐ | ☐ | ☐ | ☐ |
| Felt calm and peaceful | ☐ | ☐ | ☐ | ☐ | ☐ |
| Felt energetic | ☐ | ☐ | ☐ | ☐ | ☐ |
| Felt depressed | ☐ | ☐ | ☐ | ☐ | ☐ |
| Felt exhausted | ☐ | ☐ | ☐ | ☐ | ☐ |
| Felt happy | ☐ | ☐ | ☐ | ☐ | ☐ |
| Felt fatigued | ☐ | ☐ | ☐ | ☐ | ☐ |

## Section 10 — Social Connections and Support

Q1. About your family and relatives:

1. Household composition

How many people (including yourself) live in your household?

→ (　　　) persons

2. Marital status

☐ Married

☐ Not married (widowed)

☐ Not married (divorced)

☐ Never married

3. Do you have any family members or relatives you meet or talk with at least once a month?

→ About (　　　) persons

4. How many family members or relatives do you feel close enough to talk to about personal matters?

→ About (　　　) persons

5. How many family members or relatives do you feel close enough to ask for help?

→ About (　　　) persons

Q2. About your friends (including those living nearby):

1. How many friends do you meet or talk with at least once a month?

→ About (　　　) persons

2. How many friends do you feel close enough to talk to about personal matters?

→ About (　　　) persons

3. How many friends do you feel close enough to ask for help?

→ About (　　　) persons

Q3. About the support you provide to others:

1. How many people do you listen to when they want to share concerns or complaints?

→ About (　　　) persons

2. How many people do you care for or look after (e.g., nursing or daily care)?

→ About (　　　) persons

## Section 11 — Daily Activities and Time Use (Past Week)

Please reflect on the past week and indicate how frequently you engaged in the following activities, and approximately how much time you spent on each per day. If you did not engage in an activity, please write “0”.

| Activity | Days per week | Hours per day | Minutes per day |
| --- | --- | --- | --- |
| 1. Personal care (e.g., washing face, brushing teeth) | (　　) | (　　) | (　　) |
| 2. Eating | (　　) | (　　) | (　　) |
| 3. Commuting to work or school | (　　) | (　　) | (　　) |
| 4. Transportation (other than commuting) | (　　) | (　　) | (　　) |
| 5. Schoolwork | (　　) | (　　) | (　　) |
| 6. Housework | (　　) | (　　) | (　　) |
| 7. Nursing or caregiving | (　　) | (　　) | (　　) |
| 8. Childcare | (　　) | (　　) | (　　) |
| 9. Shopping | (　　) | (　　) | (　　) |
| 10. Watching TV, listening to the radio, reading newspapers or magazines | (　　) | (　　) | (　　) |
| 11. Resting or relaxing | (　　) | (　　) | (　　) |
| 12. Learning or self-development (excluding schoolwork) | (　　) | (　　) | (　　) |
| 13. Hobbies or leisure activities | (　　) | (　　) | (　　) |
| 14. Sports | (　　) | (　　) | (　　) |
| 15. Volunteer or social participation (excluding employment) | (　　) | (　　) | (　　) |
| 16. Socializing | (　　) | (　　) | (　　) |
| 17. Medical visits or recuperation | (　　) | (　　) | (　　) |
| 18. Other (please specify: ________________) | (　　) | (　　) | (　　) |

*Note: For “self-development,” include activities such as acquiring knowledge, training for work, or studying for certifications. Exclude activities performed as part of formal education.*

## Section 12 — Recent Feelings and Health Status (Past Two Weeks)

Q1. Thinking about the past two weeks, how closely do the following statements apply to you?

| Statement | Always | Often | Sometimes | Rarely | Never |
| --- | --- | --- | --- | --- | --- |
| ① I felt cheerful and happy | ☐ | ☐ | ☐ | ☐ | ☐ |
| ② I felt calm and relaxed | ☐ | ☐ | ☐ | ☐ | ☐ |
| ③ I felt motivated and active | ☐ | ☐ | ☐ | ☐ | ☐ |
| ④ I was well rested and woke up feeling refreshed | ☐ | ☐ | ☐ | ☐ | ☐ |
| ⑤ I found many things in daily life that interested me | ☐ | ☐ | ☐ | ☐ | ☐ |

Q2. Are you satisfied with the following aspects of your life?

| Item | Satisfied | Somewhat satisfied | Not very satisfied | Not satisfied |
| --- | --- | --- | --- | --- |
| ① Overall life | ☐ | ☐ | ☐ | ☐ |
| ② Physical functioning | ☐ | ☐ | ☐ | ☐ |
| ③ Feelings and mood | ☐ | ☐ | ☐ | ☐ |
| ④ Interpersonal relationships | ☐ | ☐ | ☐ | ☐ |

Q3. Over the past week, how closely do the following apply to your physical or mental state?

| Statement | Almost never | Occasionally | Sometimes | Often |
| --- | --- | --- | --- | --- |
| ① Things that normally don’t bother me felt annoying | ☐ | ☐ | ☐ | ☐ |
| ② I lost my appetite or didn’t want to eat | ☐ | ☐ | ☐ | ☐ |
| ③ I couldn’t feel better even when encouraged by family/friends | ☐ | ☐ | ☐ | ☐ |
| ④ I feel as capable as others | ☐ | ☐ | ☐ | ☐ |
| ⑤ I had trouble concentrating | ☐ | ☐ | ☐ | ☐ |
| ⑥ I felt blue or depressed | ☐ | ☐ | ☐ | ☐ |
| ⑦ Everything felt like a burden | ☐ | ☐ | ☐ | ☐ |
| ⑧ I could not think positively about the future | ☐ | ☐ | ☐ | ☐ |
| ⑨ I dwelled on past events | ☐ | ☐ | ☐ | ☐ |
| ⑩ I felt anxious or fearful | ☐ | ☐ | ☐ | ☐ |
| ⑪ I had trouble sleeping | ☐ | ☐ | ☐ | ☐ |
| ⑫ I was satisfied with my life | ☐ | ☐ | ☐ | ☐ |
| ⑬ I was less talkative or avoided conversation | ☐ | ☐ | ☐ | ☐ |
| ⑭ I felt lonely | ☐ | ☐ | ☐ | ☐ |
| ⑮ I felt people were distant or unfriendly | ☐ | ☐ | ☐ | ☐ |
| ⑯ I enjoyed my daily life | ☐ | ☐ | ☐ | ☐ |
| ⑰ I suddenly felt like crying | ☐ | ☐ | ☐ | ☐ |
| ⑱ I felt sad | ☐ | ☐ | ☐ | ☐ |
| ⑲ I felt disliked by others | ☐ | ☐ | ☐ | ☐ |
| ⑳ I was unable to focus on work or study | ☐ | ☐ | ☐ | ☐ |

## Section 13 — Living Environment and Perceived Neighborhood Conditions

Q1. What type of residence do you currently live in?

☐ Detached house (single-family)

☐ Apartment or condominium

☐ Public housing

☐ Rental house

☐ Other (please specify): _____________

Q2. How long have you lived in your current residence?

→ Approximately (　　　) years

Q3. Do you feel your current place of residence is a good place to live?

☐ Yes

☐ No

Q4. In your neighborhood, are the following facilities or places available within a 15-minute walk?

| Facility/Place | Yes | No | Don’t know |
| --- | --- | --- | --- |
| A. Public transportation (bus stop, train station) | ☐ | ☐ | ☐ |
| B. Shopping facilities (supermarket, convenience store) | ☐ | ☐ | ☐ |
| C. Restaurants or cafes | ☐ | ☐ | ☐ |
| D. Parks or open green spaces | ☐ | ☐ | ☐ |
| E. Community centers or meeting places | ☐ | ☐ | ☐ |
| F. Medical institutions | ☐ | ☐ | ☐ |
| G. Pharmacies or drugstores | ☐ | ☐ | ☐ |

Q5. How strongly do you agree or disagree with the following statements about your neighborhood?

| Statement | Strongly agree | Agree | Neutral | Disagree | Strongly disagree |
| --- | --- | --- | --- | --- | --- |
| A. It is safe to walk alone in my neighborhood during the day | ☐ | ☐ | ☐ | ☐ | ☐ |
| B. It is safe to walk alone at night in my neighborhood | ☐ | ☐ | ☐ | ☐ | ☐ |
| C. There are lots of people out and about in the neighborhood | ☐ | ☐ | ☐ | ☐ | ☐ |
| D. People in my neighborhood are friendly | ☐ | ☐ | ☐ | ☐ | ☐ |
| E. People in my neighborhood help each other | ☐ | ☐ | ☐ | ☐ | ☐ |
| F. I feel I belong to this neighborhood | ☐ | ☐ | ☐ | ☐ | ☐ |

## Section 14 — Life Satisfaction, Health Awareness, and Other Items

Q1. Which of the following best describes your current level of life satisfaction?

☐ Very satisfied

☐ Satisfied

☐ Neutral

☐ Dissatisfied

☐ Very dissatisfied

Q2. Do you have any concerns or worries about your health?

☐ Yes

☐ No

If yes, please briefly describe:

→ ________________________________________________________

Q3. Are you currently receiving any health guidance or lifestyle advice (e.g., dietary guidance, exercise therapy)?

☐ Yes

☐ No

If yes, what kind?

→ ________________________________________________________

Q4. Do you think your health has improved as a result of health checkups or guidance?

☐ Yes

☐ No

☐ Not sure

Q5. Have you made any changes in your daily life based on the results of your health checkups or advice received?

☐ Yes

☐ No

If yes, what changes have you made?

→ ________________________________________________________
